# Supplementary material for: Targeted Next-Generation Sequencing for the Identification of Genetic Predictors of Radiation-Induced Late Skin Toxicity in Breast Cancer Patients: A Preliminary Study
Source: MDPI journal article supplement (doi:10.3390/jpm11100967), 2021-09-27
Supplement: s1 [file s1]

**Supplementary Table S1.** Comparison of patients' characteristics between the exploratory (n=48) and the validation cohort (n=237).

| Clinical variable               | Exploratory cohort<br>Mean (SD) or n (%) | Validation cohort<br>Mean (SD) or n (%) | p-value* |
|---------------------------------|------------------------------------------|-----------------------------------------|----------|
| Age, years (SD)                 | 59.5 (9.8)                               | 61.1 (10.1)                             | 0.320    |
| BMI, mean (SD)                  | 25.4 (3.6)                               | 24.9 (3.9)                              | 0.448    |
| Breast diameter, cm (SD)        | 12.1 (2.6)                               | 12.2 (2.7)                              | 0.790    |
| Breast CTV, cc (SD)             | 351.5 (215.4)                            | 403.2 (574.7)                           | 0.316    |
| Follow-up, years (SD)           | 10.4 (3.5)                               | 10.3 (4.1)                              | 0.847    |
| Diabetes mellitus               |                                          |                                         | 0.729    |
| No                              | 46 (95.8)                                | 221 (93.2)                              |          |
| Yes                             | 2 (4.2)                                  | 16 (6.8)                                |          |
| Hypertension                    |                                          |                                         | 0.462    |
| No                              | 33 (68.8)                                | 178 (75.1)                              |          |
| Yes                             | 15 (31.3)                                | 59 (24.9)                               |          |
| Vascular disease                |                                          |                                         | 0.903    |
| No                              | 45 (93.8)                                | 218 (92.0)                              |          |
| Yes                             | 3 (6.3)                                  | 19 (8.0)                                |          |
| Tabagism                        |                                          |                                         | 0.020    |
| Never                           | 35 (72.9)                                | 207 (87.3)                              |          |
| Current or former               | 13 (27.1)                                | 30 (12.7)                               |          |
| Alcohol                         |                                          |                                         | 0.989    |
| No                              | 46 (95.8)                                | 230 (97.0)                              |          |
| Yes                             | 2 (4.2)                                  | 7 (3.0)                                 |          |
| Post-surgical complications     |                                          |                                         | 0.746    |
| None                            | 39 (81.3)                                | 200 (84.4)                              |          |
| Seromas and hematomas           | 9 (18.8)                                 | 37 (15.6)                               |          |
| Neoadjuvant CT                  |                                          |                                         | 0.743    |
| No                              | 47 (97.9)                                | 231 (97.5)                              |          |
| Yes                             | 1 (2.1)                                  | 6 (2.5)                                 |          |
| Adjuvant treatments             |                                          |                                         | 0.245    |
| None                            | 7 (14.6)                                 | 33 (13.9)                               |          |
| Chemotherapy (C)                | 13 (27.1)                                | 48 (20.3)                               |          |
| Hormone Therapy (HT)            | 16 (33.3)                                | 115 (48.5)                              |          |
| C+HT                            | 12 (25.0)                                | 41 (17.3)                               |          |
| Radiation quality               |                                          |                                         | 0.903    |
| X-rays                          | 44 (91.7)                                | 219 (92.4)                              |          |
| $\gamma$ -rays                  | 4 (8.3)                                  | 18 (7.6)                                |          |
| Dose/fraction                   |                                          |                                         | 0.772    |
| 2 Gy                            | 47 (97.9)                                | 227 (95.8)                              |          |
| 1,8 Gy                          | 1 (2.1)                                  | 10 (4.2)                                |          |
| Boost dose/fraction             |                                          |                                         | 0.731    |
| 3 Gy                            | 10 (20.8)                                | 62 (26.2)                               |          |
| 1.5-2 Gy                        | 34 (70.8)                                | 155 (65.4)                              |          |
| No boost                        | 4 (8.3)                                  | 20 (8.4)                                |          |
| Acute skin toxicity, RTOG grade |                                          |                                         | 0.861    |
| 0-1                             | 32 (66.7)                                | 164 (69.2)                              |          |
| $\geq 2$                        | 16 (33.3)                                | 73 (30.8)                               |          |

\*The chi-squared test was used for assessing differences among groups in the distribution of categorical variables, while the Student's t-test or the Welch's F test was applied, respectively, for continuous variables with equal or unequal variances. BMI, body mass index; CT, chemotherapy; CTV, clinical target volume; HT, hormone therapy; n, number; RTOG, Radiation Therapy Oncology Group; SD, standard deviation.
